# Supplementary material for: Therapy with direct oral anticoagulants for secondary prevention of thromboembolic events in the antiphospholipid syndrome: a systematic review and meta-analysis of randomised trials
Source: HighWire-hosted journal article supplement (doi:10.1136/lupus-2023-001018), 2023-10-01

### Appendix figure 3. Forest plots of review outcomes Risk Difference Random

#### A: New thrombotic event

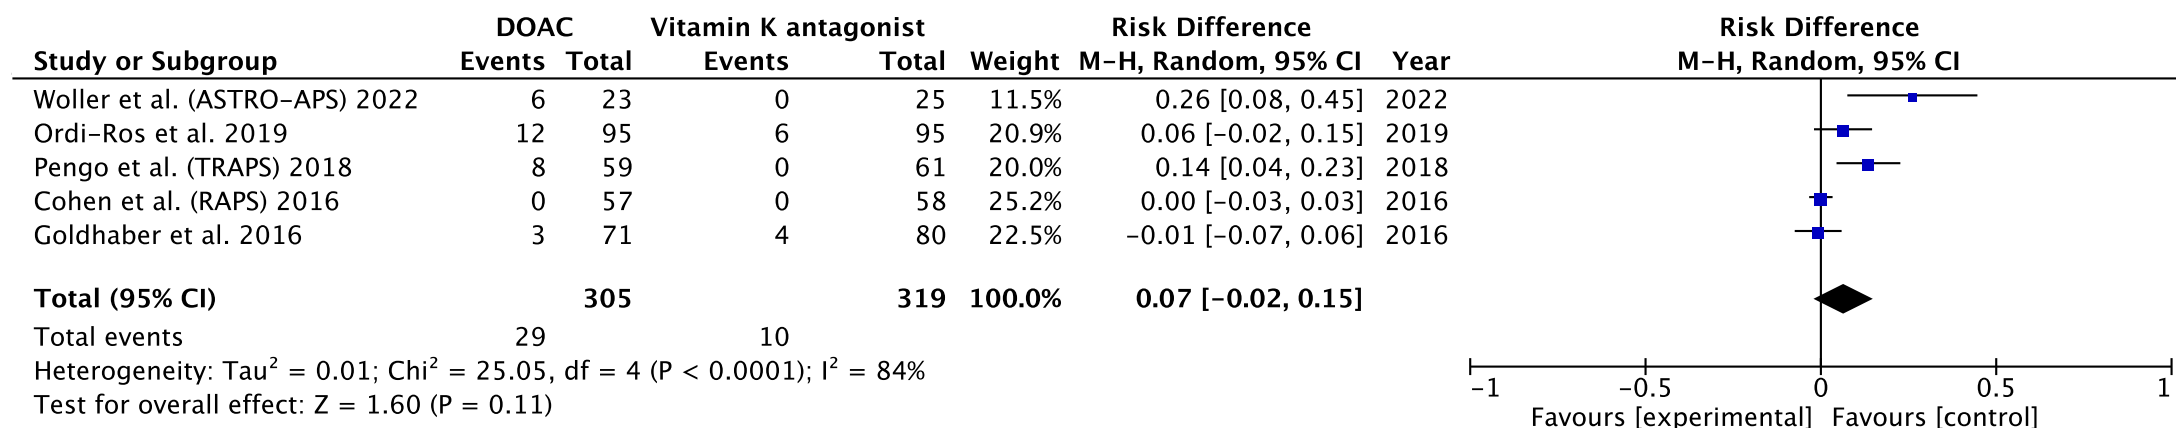

#### B: Overall bleeding event

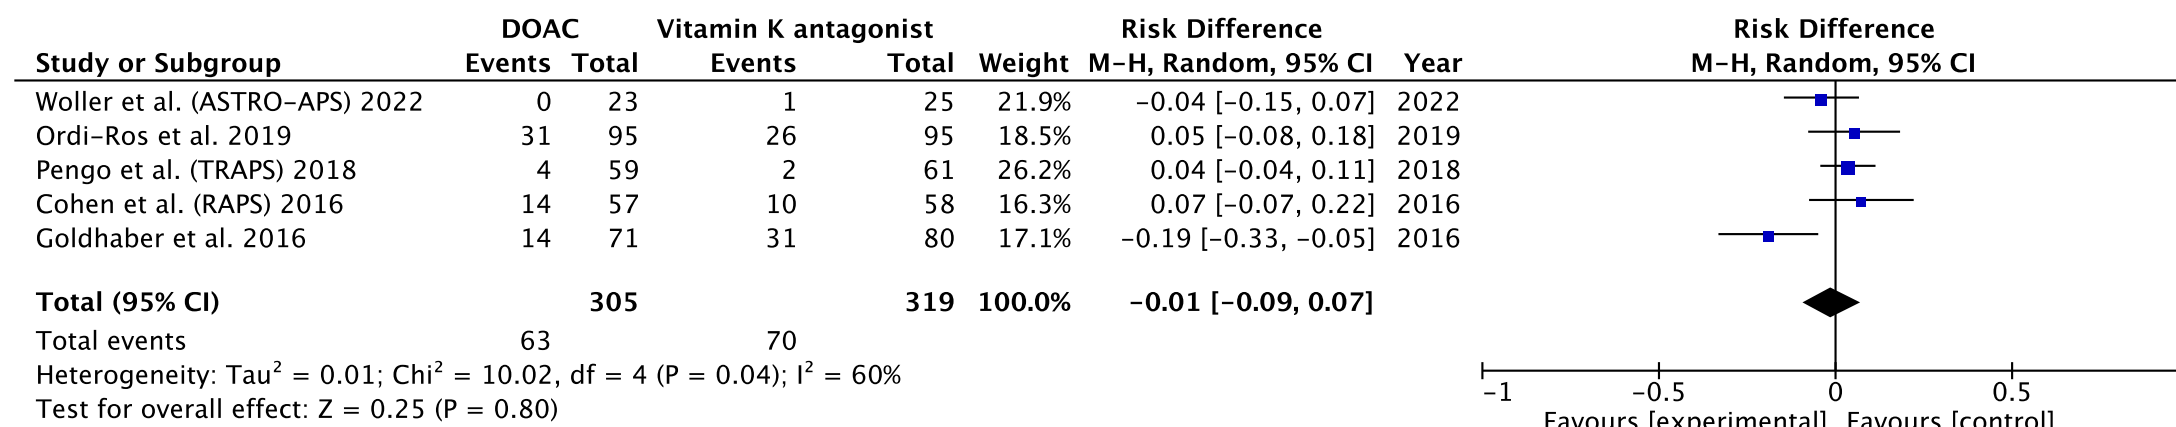

#### C: Major bleeding event

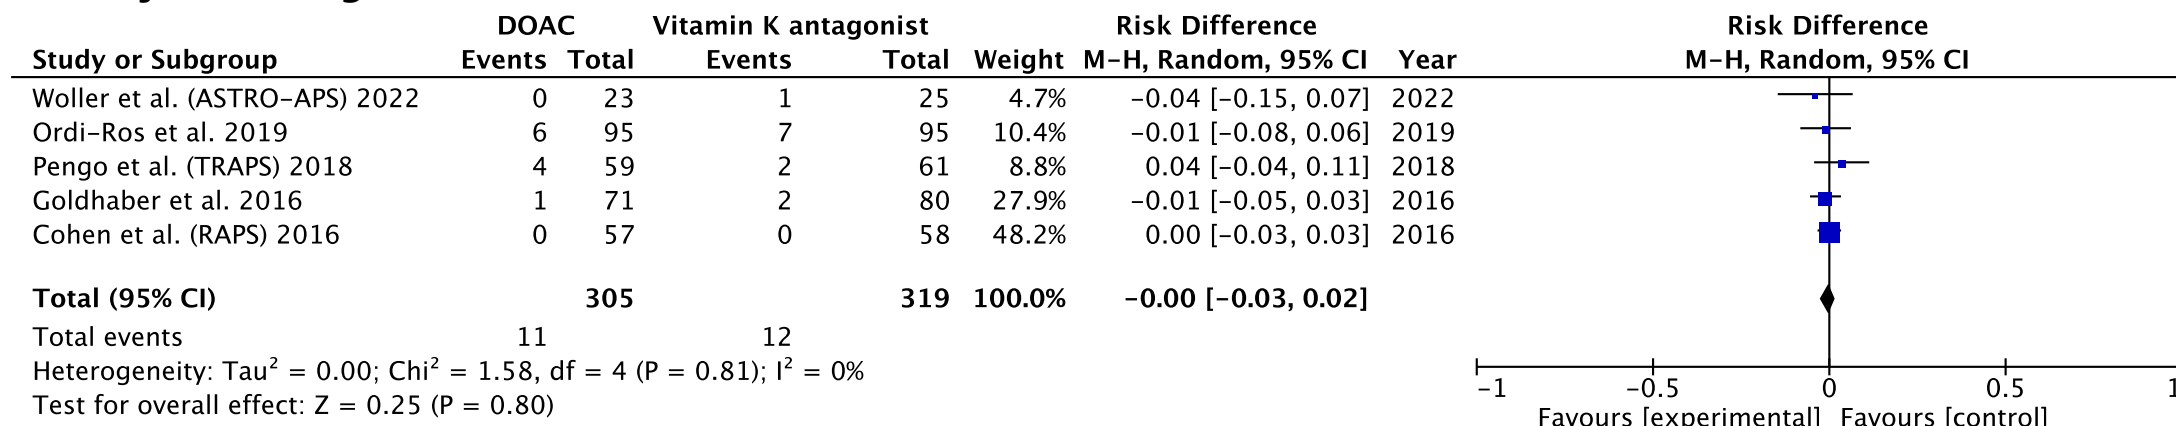

#### D: Death

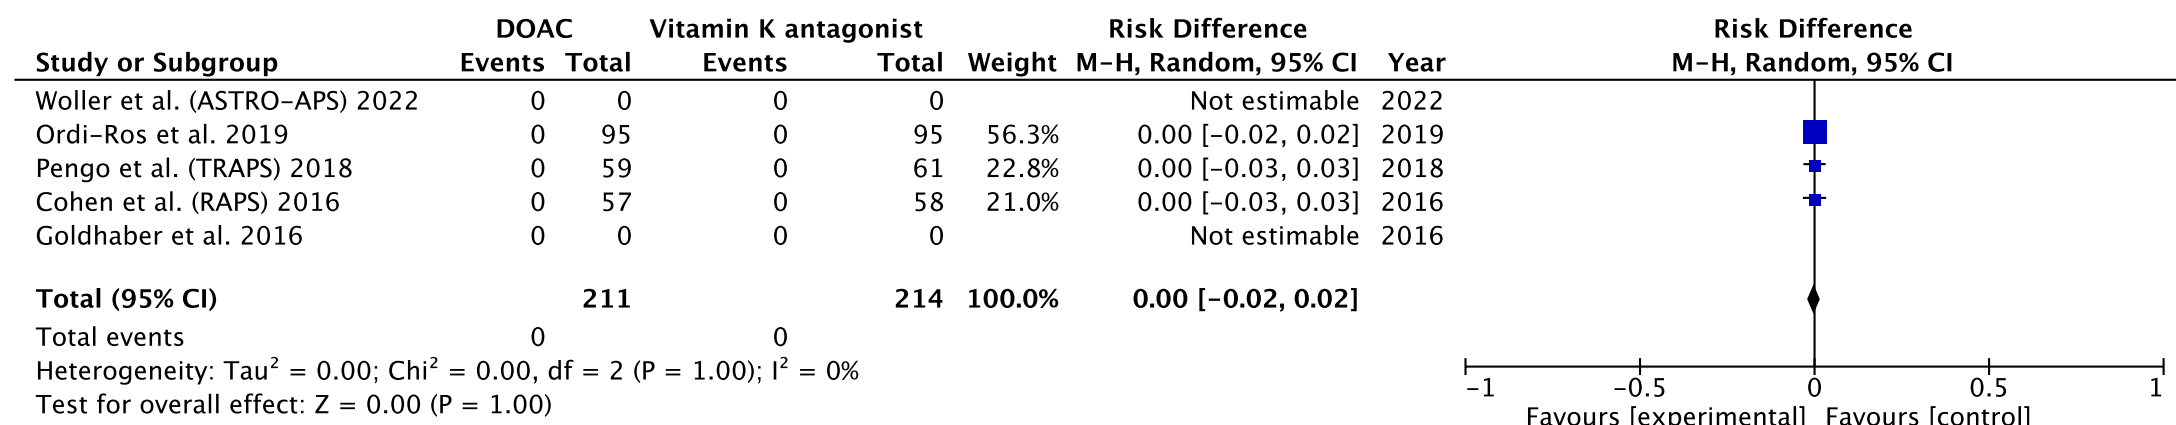

Supplement: lupus-2023-001018supp005_data_supplement.pdf [file lupus-2023-001018supp005_data_supplement.pdf]
